# Supplementary material for: Design and construction of an organic crystal with a novel interpenetrated n-Borromean linked topology
Source: Royal Society of Chemistry journal article supplement (doi:10.1039/c0cc01491e), 2010-01-01
Supplement: c0cc01491e.pdf [file c0cc01491e.pdf]

Electronic Supplementary Information for *Chemical Communications*

## **Design and construction of an organic crystal with a novel interpenetrated n-Borromean linked topology**

Yong-Biao Men,<sup>a</sup> Junliang Sun,<sup>\*b</sup> Zhi-Tang Huang<sup>a</sup> and Qi-Yu Zheng<sup>\*a</sup>

<sup>a</sup> *Beijing National Laboratory for Molecular Sciences, CAS Key Laboratory of Molecular Recognition and Function, Institute of Chemistry, Chinese Academy of Sciences, Beijing 100190, China.*

<sup>b</sup> *Structural Chemistry and Berzelii Centre EXSELENT on Porous Materials, Stockholm University, SE-106 91 Stockholm, Sweden.*

### **Electronic Supplementary Information**

- 1. Experimental Section**
- 2. Figure S1-S4**

## 1. Experimental section

### Preparation of [2TCA•3dpyb].

A mixture of 1,3,5-tris(4-carboxy-phenyl)adamantane (TCA) (15 mg, 0.03 mmol) and 1,4-di(pyridin-4-yl)benzene (dpyb) (10.4 mg, 0.045 mmol) was dissolved in THF/MeOH (v/v=1:2, 15 mL). The solution was filtered and left to stand at room temperature. Upon slow evaporation of the solvents, block colorless crystals single crystals suitable for X-ray diffraction were produced over a period of two weeks.

## 2. Figure S1-S4

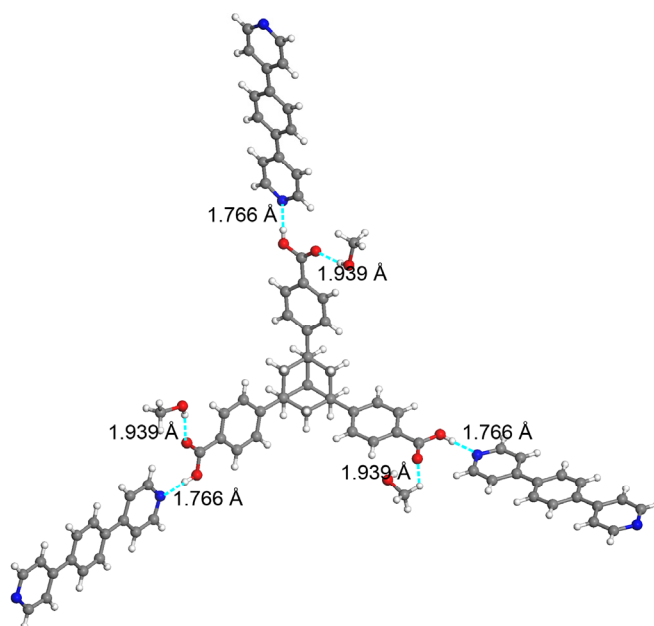

**Fig. S1** Ball and stick view of the hydrogen bonds of TCA with dpyb and methanol in **[2TCA•3dpyb]**. Red: O; blue: N; gray: C; white: H.

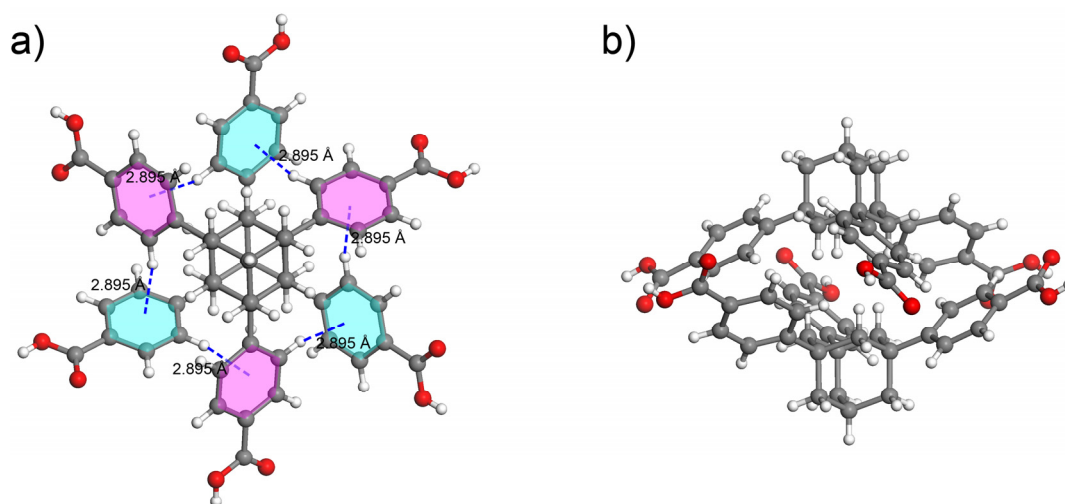

**Fig. S2** Ball and stick view of the six-fold phenyl embrace and C—H... $\pi$  interactions of TCA dimer in **[2TCA•3dpyb]**. Red: O; blue: N; gray: C; white: H. a) top view; b) side view.

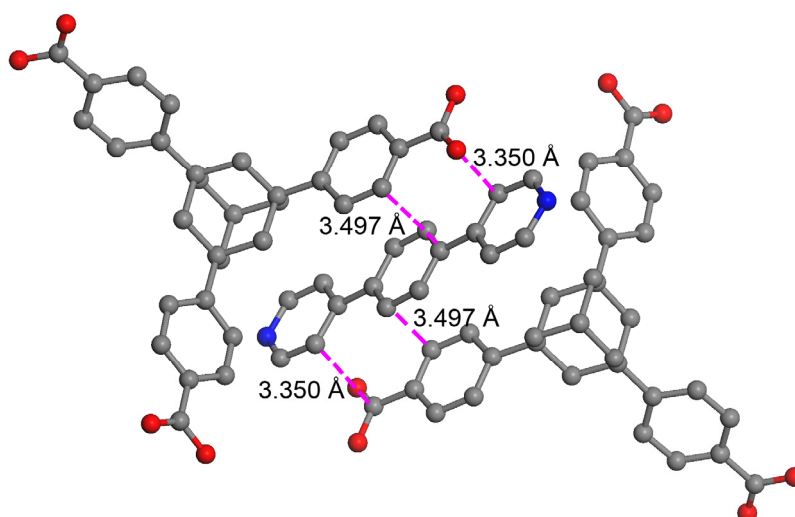

**Fig. S3** Ball and stick view of  $\pi \cdots \pi$  interactions of TCA-dpyb-TCA edges in [2TCA•3dpyb]. Red: O; blue: N; gray: C. The hydrogen atoms are omitted for clarity.

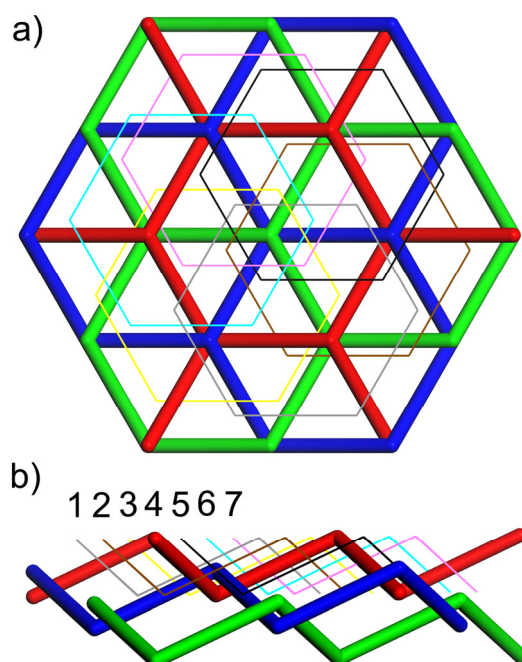

**Fig. S4** Different topological view of the 7-fold interpenetrated 2D→3D extended Borromean-linked networks in [2TCA•3dpyb]. a) Top view. b) Side View. Three honeycomb nets in a Borromean weave are shown as red, blue and green with thick stick. The hexagonal rings of other six n-Borromean networks are shown as different colours with thin stick.
